# Supplementary material
Source: PubMed Central journal article supplement (PMC10335325)
Supplement: NIHMS1895904-supplement-Table_S1.pdf [file NIHMS1895904-supplement-Table_S1.pdf]

**Supplementary table S1. Additional genetic syndromes associated with pediatric pulmonary hypertension, 36 of 1475 patients (2.4%). See Table 5 for most common syndromes (214 of 1475 patients, 14.5%).**

| <b>Syndrome</b>                  | <b>Frequency</b> | <b>WSPH Group</b> |                  |                  |
|----------------------------------|------------------|-------------------|------------------|------------------|
|                                  |                  | <b>Patient 1</b>  | <b>Patient 2</b> | <b>Patient 3</b> |
| ABCA 3 Surfactant Deficiency     | 1                | 3.2.3             |                  |                  |
| Surfactant Type C Deficiency     | 1                | 3.7.1             |                  |                  |
| Adam Oliver                      | 1                | 1.2               |                  |                  |
| Alagille                         | 3                | 1.4.4             | 1.4.4            | 3.7.3            |
| Baraitser-Winter                 | 1                | 1.4.4             |                  |                  |
| Beckwith-Wiedeman                | 2                | 3.7.1             | 1.4.4            |                  |
| Congenital muscular dystrophy    | 1                | 3.7               |                  |                  |
| Cornelia De Lange                | 2                | 3.7.3             | 3.7.1            |                  |
| Dicer 1                          | 1                | 5.5               |                  |                  |
| Donnai-Barrow                    | 1                | 3.7.3             |                  |                  |
| Eagle-Barrett                    | 1                | 1.1               |                  |                  |
| Ehlers-Danlos                    | 1                | 3.7               |                  |                  |
| Fryns                            | 2                | 3.7.3             | 3.7.3            |                  |
| Holt-Oram                        | 1                | 1.4.4             |                  |                  |
| Jacobsen                         | 2                | 3.7.1             | 1.4.4            |                  |
| Kleefstra                        | 2                | 1"                | 1.4.4            |                  |
| Klippel-Feil                     | 1                | 3.3               |                  |                  |
| Klippel-Trenanunay-Weber         | 1                | 1.4.4             |                  |                  |
| Mayer-Rokitansky-Kuster-Hauser   | 1                | 1.4.4             |                  |                  |
| Mowat-Wilson                     | 1                | 2.3               |                  |                  |
| Osteogenesis Imperfecta Type III | 1                | 3.7               |                  |                  |
| Pierre Robin                     | 3                | 3.7.1             | 3.7.3            | 1.4.4            |
| Pompe's Disease                  | 1                | 5.3               |                  |                  |
| Smith-Lemli-Opitz                | 1                | 2.4               |                  |                  |
| Trisomy 6                        | 1                | 1"                |                  |                  |
| Turner                           | 1                | 3.7.3             |                  |                  |
| Wager                            | 1                | 1.4.4             |                  |                  |
| <b>TOTAL</b>                     | <b>36</b>        |                   |                  |                  |
