# Supplementary material
Source: PubMed Central journal article supplement (PMC10335325)
Supplement: NIHMS1895904-supplement-Table_S2.pdf [file NIHMS1895904-supplement-Table_S2.pdf]

**Supplementary table S2. Testing and interventions and key haemodynamic parameters performed at time of pulmonary hypertension diagnosis, overall and by primary WSPH group. Total N (data available) ranges from 1416 to 1438 according to test, out of total cohort N=1475. Some percentages may not total to 100% due to rounding.**

|                       | Overall<br>(n=1475) | WSPH               |                   |                    |                  |                   | Grp 1<br>vs. 3<br>pvalue |
|-----------------------|---------------------|--------------------|-------------------|--------------------|------------------|-------------------|--------------------------|
|                       |                     | Group 1<br>(n=663) | Group 2<br>(n=54) | Group 3<br>(n=720) | Group 4<br>(n=8) | Group 5<br>(n=30) |                          |
| Echo                  |                     |                    |                   |                    |                  |                   | 0.88                     |
| Yes                   | 1433 (99.2%)        | 640 (99.2%)        | 54 (100%)         | 701 (99.2%)        | 8 (100%)         | 30 (100%)         |                          |
| No                    | 11 (0.8%)           | 5 (0.8%)           | 0 (0%)            | 6 (0.8%)           | 0 (0%)           | 0 (0%)            |                          |
| ECG                   |                     |                    |                   |                    |                  |                   | <.001                    |
| Yes                   | 893 (63.0%)         | 476 (75.8%)        | 37 (69.8%)        | 354 (50.6%)        | 7 (87.5%)        | 19 (63.3%)        |                          |
| No                    | 525 (37.0%)         | 152 (24.2%)        | 16 (30.2%)        | 345 (49.4%)        | 1 (12.5%)        | 11 (36.7%)        |                          |
| 6-MWD                 |                     |                    |                   |                    |                  |                   | <.001                    |
| Yes                   | 91 (6.4%)           | 76 (12.0%)         | 1 (2.0%)          | 10 (1.4%)          | 2 (25.0%)        | 2 (6.7%)          |                          |
| No                    | 1338 (93.6%)        | 559 (88.0%)        | 50 (98.0%)        | 695 (98.6%)        | 6 (75.0%)        | 28 (93.3%)        |                          |
| Exercise test         |                     |                    |                   |                    |                  |                   | <.001                    |
| Yes                   | 30 (2.1%)           | 25 (3.9%)          | 0 (0%)            | 3 (0.4%)           | 0 (0%)           | 2 (6.7%)          |                          |
| No                    | 1398 (97.9%)        | 609 (96.1%)        | 51 (100%)         | 702 (99.6%)        | 8 (100%)         | 28 (93.3%)        |                          |
| MRI                   |                     |                    |                   |                    |                  |                   | <.001                    |
| Yes                   | 40 (2.8%)           | 30 (4.8%)          | 1 (1.9%)          | 7 (1.0%)           | 1 (12.5%)        | 1 (3.3%)          |                          |
| No                    | 1376 (97.2%)        | 595 (95.2%)        | 51 (98.1%)        | 694 (99.0%)        | 7 (87.5%)        | 29 (96.7%)        |                          |
| Chest X-rays          |                     |                    |                   |                    |                  |                   | 0.001                    |
| Yes                   | 1038 (73.3%)        | 434 (69.4%)        | 38 (73.1%)        | 541 (77.2%)        | 6 (75.0%)        | 19 (63.3%)        |                          |
| No                    | 378 (26.7%)         | 191 (30.6%)        | 14 (26.9%)        | 160 (22.8%)        | 2 (25.0%)        | 11 (36.7%)        |                          |
| Chest CT              |                     |                    |                   |                    |                  |                   | <.001                    |
| Yes                   | 274 (19.3%)         | 162 (25.8%)        | 6 (11.5%)         | 90 (12.8%)         | 6 (75.0%)        | 10 (33.3%)        |                          |
| No                    | 1146 (80.7%)        | 466 (74.2%)        | 46 (88.5%)        | 612 (87.2%)        | 2 (25.0%)        | 20 (66.7%)        |                          |
| PFT                   |                     |                    |                   |                    |                  |                   | <.001                    |
| Yes                   | 64 (4.5%)           | 46 (7.2%)          | 4 (7.5%)          | 11 (1.6%)          | 1 (12.5%)        | 2 (6.7%)          |                          |
| No                    | 1363 (95.5%)        | 589 (92.8%)        | 49 (92.5%)        | 690 (98.4%)        | 7 (87.5%)        | 28 (93.3%)        |                          |
| Card. catheterization |                     |                    |                   |                    |                  |                   | <.001                    |
| Yes                   | 722 (50.2%)         | 450 (69.8%)        | 42 (79.2%)        | 210 (29.9%)        | 4 (50.0%)        | 16 (53.3%)        |                          |
| No                    | 716 (49.8%)         | 195 (30.2%)        | 11 (20.8%)        | 492 (70.1%)        | 4 (50.0%)        | 14 (46.7%)        |                          |
| Lung biopsy           |                     |                    |                   |                    |                  |                   | 0.81                     |
| Yes                   | 35 (2.5%)           | 14 (2.2%)          | 1 (1.8%)          | 17 (2.4%)          | 0 (0%)           | 3 (10.0%)         |                          |

|                                   | Overall<br>(n=1475) | WSPH               |                   |                    |                   |                   | Grp 1<br>vs. 3<br>pvalue |
|-----------------------------------|---------------------|--------------------|-------------------|--------------------|-------------------|-------------------|--------------------------|
|                                   |                     | Group 1<br>(n=663) | Group 2<br>(n=54) | Group 3<br>(n=720) | Group 4<br>(n=8)  | Group 5<br>(n=30) |                          |
| No Interventions                  | 1391 (97.5%)        | 615 (97.8%)        | 55 (98.2%)        | 686 (97.6%)        | 8 (100%)          | 27 (90.0%)        | <.001                    |
| Yes                               | 93 (6.5%)           | 24 (3.8%)          | 0 (0%)            | 67 (9.5%)          | 1 (12.5%)         | 1 (3.3%)          |                          |
| No Hospitalization                | 1336 (93.5%)        | 611 (96.2%)        | 52 (100%)         | 637 (90.5%)        | 7 (87.5%)         | 29 (96.7%)        | <.001                    |
| Yes                               | 1032 (72.0%)        | 395 (62.5%)        | 40 (75.5%)        | 572 (80.6%)        | 6 (75.0%)         | 19 (63.3%)        |                          |
| No                                | 401 (28.0%)         | 237 (37.5%)        | 13 (24.5%)        | 138 (19.4%)        | 2 (25.0%)         | 11 (36.7%)        |                          |
| <b>Hemodynamics at Diagnosis*</b> |                     |                    |                   |                    |                   |                   |                          |
| PVRI, Woods units**               | 7.1 (4.6, 13.4)     | 9.0 (5.0, 16.1)    | 7.2 (3.8, 14.2)   | 5.8 (4.3, 8.3)     | 6.3 (6.3, 6.3)    | 4.3 (3.6, 4.8)    | <.001                    |
| PVRI:SVRI**                       | 0.50 (0.32, 0.80)   | 0.58 (0.33, 0.90)  | 0.50 (0.36, 0.58) | 0.41 (0.29, 0.62)  | 0.27 (0.27, 0.27) | 0.35 (0.22, 0.45) | <.001                    |
| Mean PAP, mmHg                    | 43.4 ± 19.3         | 46.6 ± 20.4        | 44.3 ± 17.7       | 37.1 ± 15.5        | 35.0 ± 12.3       | 31.6 ± 11.5       | <.001                    |
| Mean PAP:SBP**                    | 0.73 (0.50, 0.96)   | 0.79 (0.56, 1.00)  | 0.61 (0.52, 1.00) | 0.57 (0.46, 0.85)  | 0.57 (0.44, 0.69) | 0.56 (0.32, 0.85) | <.001                    |
| Mean RAP, mmHg                    | 7.1 ± 3.3           | 7.1 ± 3.3          | 8.3 ± 3.7         | 6.7 ± 2.9          | 12.3 ± 5.5        | 7.6 ± 4.4         | 0.08                     |

MRI = magnetic resonance imaging; CT=computed tomography; PFT=pulmonary function test; MWD=minute walk distance; Card.=cardiac; PVRI=pulmonary vascular resistance index; PAP=pulmonary artery pressure; RAP=right atrial pressure

\*Hemodynamics total N = 612 for PVRI; 531 for PVRI:SVRI, 690 for mean PAP; 500 for Mean PAP:Systolic blood pressure; 635 for mean RAP

\*\*median (interquartile range)
