# Supplementary material
Source: PubMed Central journal article supplement (PMC10335325)
Supplement: NIHMS1895904-supplement-Table_S4.pdf [file NIHMS1895904-supplement-Table_S4.pdf]

**Supplementary table S4. Functional class by paediatric and WHO systems at the time of diagnosis of pulmonary hypertension, by WSPH group. Column percentages for each system total to 100%. The p-value tests equality of the distributions of each system for the Group 1 vs. Group 3 cohorts.**

| Functional Class             | Overall<br>(n=1475) | WSPH               |                   |                    |                  |                   | Grp 1<br>vs. 3<br>Pvalue |
|------------------------------|---------------------|--------------------|-------------------|--------------------|------------------|-------------------|--------------------------|
|                              |                     | Group 1<br>(n=663) | Group 2<br>(n=54) | Group 3<br>(n=720) | Group 4<br>(n=8) | Group 5<br>(n=30) |                          |
| Pediatric                    | 791                 | 341                | 28                | 400                | 791              | 17                | <b>&lt;.001</b>          |
| I                            | 104 (13.1%)         | 55 (16.1%)         | 7 (25.0%)         | 39 (9.8%)          | 0 (0%)           | 3 (17.6%)         |                          |
| II                           | 229 (29.0%)         | 122 (35.8%)        | 7 (25.0%)         | 90 (22.5%)         | 2 (40.0%)        | 8 (47.1%)         |                          |
| III A                        | 154 (19.5%)         | 81 (23.8%)         | 9 (32.1%)         | 62 (15.5%)         | 0 (0%)           | 2 (11.8%)         |                          |
| III B                        | 65 (8.2%)           | 28 (8.2%)          | 2 (7.1%)          | 33 (8.3%)          | 1 (20.0%)        | 1 (5.9%)          |                          |
| IV                           | 239 (30.2%)         | 55 (16.1%)         | 3 (10.7%)         | 176 (44.0%)        | 2 (40.0%)        | 3 (17.6%)         |                          |
| World Health<br>Organization | 503                 | 293                | 25                | 172                | 503              | 10                | <b>0.011</b>             |
| I                            | 105 (20.9%)         | 49 (16.7%)         | 4 (16.0%)         | 48 (27.9%)         | 0 (0%)           | 4 (40.0%)         |                          |
| II                           | 204 (40.6%)         | 132 (45.1%)        | 12 (48.0%)        | 55 (32.0%)         | 2 (66.7%)        | 3 (30.0%)         |                          |
| III                          | 138 (27.4%)         | 80 (27.3%)         | 7 (28.0%)         | 49 (28.5%)         | 0 (0%)           | 2 (20.0%)         |                          |
| IV                           | 56 (11.1%)          | 32 (10.9%)         | 2 (8.0%)          | 20 (11.6%)         | 1 (33.3%)        | 1 (10.0%)         |                          |
